# Supplementary material for: Effects of Macrofaunal Recolonization on Biogeochemical Processes and Microbiota—A Mesocosm Study
Source: MDPI journal article supplement (doi:10.3390/w13111599), 2021-06-06
Supplement: s1 [file s1]

Archive with 1 entries (1 files):
- water-1231350-supplementary.pdf
